# Supplementary material for: Expression of ribosomopathy genes during Xenopus tropicalis embryogenesis
Source: PubMed Central journal article supplement (PMC5081970; doi:10.1186/s12861-016-0138-5), 2016-10-26
Supplement: 12861_2016_138_MOESM1_ESM.pdf [file 12861_2016_138_MOESM1_ESM.pdf]

|            |    |                 |           |           |   |   |   |                                                            |
|------------|----|-----------------|-----------|-----------|---|---|---|------------------------------------------------------------|
| scaffold_7 | NO | gene            | 54735692  | 54743620  | . | + | . | ID=Xetro.N01056;Name=rps17;                                |
| scaffold_7 | NO | mRNA            | 54735692  | 54743620  | . | + | . | ID=Xetro.N01056.1;Name=rps17.3;Parent=Xetro.N01056;        |
| scaffold_7 | NO | exon            | 54735727  | 54735727  | . | + | . | ID=Xetro.N01056.1.exon.1;Parent=Xetro.N01056.1;            |
| scaffold_7 | NO | five_prime_UTR  | 54735692  | 54735724  | . | + | . | ID=Xetro.N01056.1.five_prime_UTR.1;Parent=Xetro.N01056.1;  |
| scaffold_7 | NO | CDS             | 54735725  | 54735727  | . | + | 0 | ID=Xetro.N01056.1.CDS.1;Parent=Xetro.N01056.1;             |
| scaffold_7 | NO | exon            | 54737263  | 54737414  | . | + | . | ID=Xetro.N01056.1.exon.2;Parent=Xetro.N01056.1;            |
| scaffold_7 | NO | CDS             | 54737263  | 54737414  | . | + | 0 | ID=Xetro.N01056.1.CDS.2;Parent=Xetro.N01056.1;             |
| scaffold_7 | NO | exon            | 54737848  | 54737953  | . | + | . | ID=Xetro.N01056.1.exon.3;Parent=Xetro.N01056.1;            |
| scaffold_7 | NO | CDS             | 54737848  | 54737953  | . | + | . | ID=Xetro.N01056.1.CDS.3;Parent=Xetro.N01056.1;             |
| scaffold_7 | NO | exon            | 54739128  | 54739193  | . | + | . | ID=Xetro.N01056.1.exon.4;Parent=Xetro.N01056.1;            |
| scaffold_7 | NO | CDS             | 54739128  | 54739193  | . | + | 0 | ID=Xetro.N01056.1.CDS.4;Parent=Xetro.N01056.1;             |
| scaffold_7 | NO | exon            | 54743496  | 54743620  | . | + | . | ID=Xetro.N01056.1.exon.5;Parent=Xetro.N01056.1;            |
| scaffold_7 | NO | CDS             | 54743496  | 54743576  | . | + | 0 | ID=Xetro.N01056.1.CDS.5;Parent=Xetro.N01056.1;             |
| scaffold_7 | NO | three_prime_UTR | 54743577  | 54743620  | . | + | . | ID=Xetro.N01056.1.three_prime_UTR.1;Parent=Xetro.N01056.1; |
| scaffold_7 | NO | gene            | 115809777 | 115815607 | . | + | . | ID=Xetro.N02086;Name=rps19;                                |
| scaffold_7 | NO | mRNA            | 115809777 | 115815607 | . | + | . | ID=Xetro.N02086.1;Name=rps19.4;Parent=Xetro.N02086;        |
| scaffold_7 | NO | exon            | 115809792 | 115809792 | . | + | . | ID=Xetro.N02086.1.exon.1;Parent=Xetro.N02086.1;            |
| scaffold_7 | NO | five_prime_UTR  | 115809777 | 115809792 | . | + | . | ID=Xetro.N02086.1.five_prime_UTR.1;Parent=Xetro.N02086.1;  |
| scaffold_7 | NO | exon            | 115811890 | 115811960 | . | + | . | ID=Xetro.N02086.1.exon.2;Parent=Xetro.N02086.1;            |
| scaffold_7 | NO | CDS             | 115811890 | 115811960 | . | + | 0 | ID=Xetro.N02086.1.CDS.1;Parent=Xetro.N02086.1;             |
| scaffold_7 | NO | exon            | 115812266 | 115812366 | . | + | . | ID=Xetro.N02086.1.exon.3;Parent=Xetro.N02086.1;            |
| scaffold_7 | NO | CDS             | 115812266 | 115812366 | . | + | 1 | ID=Xetro.N02086.1.CDS.2;Parent=Xetro.N02086.1;             |
| scaffold_7 | NO | exon            | 115813536 | 115813719 | . | + | . | ID=Xetro.N02086.1.exon.4;Parent=Xetro.N02086.1;            |
| scaffold_7 | NO | CDS             | 115813536 | 115813719 | . | + | 2 | ID=Xetro.N02086.1.CDS.3;Parent=Xetro.N02086.1;             |
| scaffold_7 | NO | exon            | 115814235 | 115814289 | . | + | . | ID=Xetro.N02086.1.exon.5;Parent=Xetro.N02086.1;            |
| scaffold_7 | NO | CDS             | 115814235 | 115814289 | . | + | 1 | ID=Xetro.N02086.1.CDS.4;Parent=Xetro.N02086.1;             |
| scaffold_7 | NO | exon            | 115815541 | 115815607 | . | + | . | ID=Xetro.N02086.1.exon.6;Parent=Xetro.N02086.1;            |
| scaffold_7 | NO | CDS             | 115815541 | 115815567 | . | + | 0 | ID=Xetro.N02086.1.CDS.5;Parent=Xetro.N02086.1;             |
| scaffold_7 | NO | three_prime_UTR | 115815568 | 115815607 | . | + | . | ID=Xetro.N02086.1.three_prime_UTR.1;Parent=Xetro.N02086.1; |
| scaffold_8 | NO | gene            | 70257390  | 70260820  | . | + | . | ID=Xetro.N01430;Name=rps29;                                |
| scaffold_8 | NO | mRNA            | 70257390  | 70260820  | . | + | . | ID=Xetro.N01430.1;Name=rps29.1;Parent=Xetro.N01430;        |
| scaffold_8 | NO | exon            | 70257461  | 70257461  | . | + | . | ID=Xetro.N01430.1.exon.1;Parent=Xetro.N01430.1;            |
| scaffold_8 | NO | exon            | 70258995  | 70258995  | . | + | . | ID=Xetro.N01430.1.exon.2;Parent=Xetro.N01430.1;            |
| scaffold_8 | NO | exon            | 70260679  | 70260820  | . | + | . | ID=Xetro.N01430.1.exon.3;Parent=Xetro.N01430.1;            |
| scaffold_5 | NO | gene            | 28896969  | 28907757  | . | - | . | ID=Xetro.N00404;Name=rps7;                                 |
| scaffold_5 | NO | mRNA            | 28896969  | 28907757  | . | - | . | ID=Xetro.N00404.1;Name=rps7.1;Parent=Xetro.N00404;         |
| scaffold_5 | NO | exon            | 28907724  | 28907757  | . | - | . | ID=Xetro.N00404.1.exon.1;Parent=Xetro.N00404.1;            |
| scaffold_5 | NO | exon            | 28906304  | 28906385  | . | - | . | ID=Xetro.N00404.1.exon.2;Parent=Xetro.N00404.1;            |
| scaffold_5 | NO | exon            | 28905193  | 28905264  | . | - | . | ID=Xetro.N00404.1.exon.3;Parent=Xetro.N00404.1;            |
| scaffold_5 | NO | exon            | 28904489  | 28904632  | . | - | . | ID=Xetro.N00404.1.exon.4;Parent=Xetro.N00404.1;            |
| scaffold_5 | NO | exon            | 28902425  | 28902489  | . | - | . | ID=Xetro.N00404.1.exon.5;Parent=Xetro.N00404.1;            |
| scaffold_5 | NO | exon            | 28898250  | 28898250  | . | - | . | ID=Xetro.N00404.1.exon.6;Parent=Xetro.N00404.1;            |
| scaffold_5 | NO | exon            | 28896969  | 28897100  | . | - | . | ID=Xetro.N00404.1.exon.7;Parent=Xetro.N00404.1;            |
| scaffold_6 | NO | gene            | 99062223  | 99066780  | . | - | . | ID=Xetro.N01284;Name=rpl15;                                |
| scaffold_6 | NO | mRNA            | 99062223  | 99066780  | . | - | . | ID=Xetro.N01284.1;Name=rpl15.3;Parent=Xetro.N01284;        |
| scaffold_6 | NO | exon            | 99066745  | 99066780  | . | - | . | ID=Xetro.N01284.1.exon.1;Parent=Xetro.N01284.1;            |
| scaffold_6 | NO | five_prime_UTR  | 99065823  | 99066745  | . | - | . | ID=Xetro.N01284.1.five_prime_UTR.1;Parent=Xetro.N01284.1;  |
| scaffold_6 | NO | exon            | 99065823  | 99066005  | . | - | . | ID=Xetro.N01284.1.exon.2;Parent=Xetro.N01284.1;            |
| scaffold_6 | NO | CDS             | 99065823  | 99065994  | . | - | 0 | ID=Xetro.N01284.1.CDS.1;Parent=Xetro.N01284.1;             |
| scaffold_6 | NO | five_prime_UTR  | 99065995  | 99066005  | . | - | . | ID=Xetro.N01284.1.five_prime_UTR.2;Parent=Xetro.N01284.1;  |
| scaffold_6 | NO | exon            | 99064376  | 99064512  | . | - | . | ID=Xetro.N01284.1.exon.3;Parent=Xetro.N01284.1;            |
| scaffold_6 | NO | CDS             | 99064376  | 99064512  | . | - | 2 | ID=Xetro.N01284.1.CDS.2;Parent=Xetro.N01284.1;             |
| scaffold_6 | NO | exon            | 99062223  | 99062589  | . | - | . | ID=Xetro.N01284.1.exon.4;Parent=Xetro.N01284.1;            |
| scaffold_6 | NO | three_prime_UTR | 99062223  | 99062283  | . | - | . | ID=Xetro.N01284.1.three_prime_UTR.1;Parent=Xetro.N01284.1; |
| scaffold_6 | NO | CDS             | 99062284  | 99062589  | . | - | 0 | ID=Xetro.N01284.1.CDS.3;Parent=Xetro.N01284.1;             |
| scaffold_3 | NO | gene            | 71973187  | 71980133  | . | - | . | ID=Xetro.N01398;Name=rpl26;                                |
| scaffold_3 | NO | mRNA            | 71973187  | 71980088  | . | - | . | ID=Xetro.N01398.1;Name=rpl26.2;Parent=Xetro.N01398;        |
| scaffold_3 | NO | exon            | 71980064  | 71980088  | . | - | . | ID=Xetro.N01398.1.exon.1;Parent=Xetro.N01398.1;            |
| scaffold_3 | NO | five_prime_UTR  | 71980064  | 71980088  | . | - | . | ID=Xetro.N01398.1.five_prime_UTR.1;Parent=Xetro.N01398.1;  |
| scaffold_3 | NO | exon            | 71978389  | 71978561  | . | - | . | ID=Xetro.N01398.1.exon.2;Parent=Xetro.N01398.1;            |
| scaffold_3 | NO | CDS             | 71978389  | 71978556  | . | - | 0 | ID=Xetro.N01398.1.CDS.1;Parent=Xetro.N01398.1;             |
| scaffold_3 | NO | five_prime_UTR  | 71978557  | 71978561  | . | - | . | ID=Xetro.N01398.1.five_prime_UTR.2;Parent=Xetro.N01398.1;  |
| scaffold_3 | NO | exon            | 71977452  | 71977592  | . | - | . | ID=Xetro.N01398.1.exon.3;Parent=Xetro.N01398.1;            |
| scaffold_3 | NO | CDS             | 71977452  | 71977592  | . | - | 0 | ID=Xetro.N01398.1.CDS.2;Parent=Xetro.N01398.1;             |
| scaffold_3 | NO | exon            | 71973348  | 71973348  | . | - | . | ID=Xetro.N01398.1.exon.4;Parent=Xetro.N01398.1;            |
| scaffold_3 | NO | three_prime_UTR | 71973187  | 71973219  | . | - | . | ID=Xetro.N01398.1.three_prime_UTR.1;Parent=Xetro.N01398.1; |
| scaffold_3 | NO | CDS             | 71973220  | 71973348  | . | - | 0 | ID=Xetro.N01398.1.CDS.3;Parent=Xetro.N01398.1;             |
| scaffold_5 | NO | gene            | 8302934   | 8306784   | . | + | . | ID=Xetro.N00125;Name=rpl35a;                               |
| scaffold_5 | NO | mRNA            | 8302934   | 8306784   | . | + | . | ID=Xetro.N00125.1;Name=rpl35a.1;Parent=Xetro.N00125;       |
| scaffold_5 | NO | exon            | 8302934   | 8302954   | . | + | . | ID=Xetro.N00125.1.exon.1;Parent=Xetro.N00125.1;            |
| scaffold_5 | NO | five_prime_UTR  | 8302934   | 8302954   | . | + | . | ID=Xetro.N00125.1.five_prime_UTR.1;Parent=Xetro.N00125.1;  |
| scaffold_5 | NO | exon            | 8304180   | 8304222   | . | + | . | ID=Xetro.N00125.1.exon.2;Parent=Xetro.N00125.1;            |
| scaffold_5 | NO | five_prime_UTR  | 8304180   | 8304211   | . | + | 0 | ID=Xetro.N00125.1.five_prime_UTR.2;Parent=Xetro.N00125.1;  |
| scaffold_5 | NO | CDS             | 8304212   | 8304222   | . | + | 0 | ID=Xetro.N00125.1.CDS.1;Parent=Xetro.N00125.1;             |
| scaffold_5 | NO | exon            | 8304967   | 8305119   | . | + | . | ID=Xetro.N00125.1.exon.3;Parent=Xetro.N00125.1;            |
| scaffold_5 | NO | CDS             | 8304967   | 8305119   | . | + | 1 | ID=Xetro.N00125.1.CDS.2;Parent=Xetro.N00125.1;             |
| scaffold_5 | NO | exon            | 8306012   | 8306784   | . | + | . | ID=Xetro.N00125.1.exon.4;Parent=Xetro.N00125.1;            |
| scaffold_5 | NO | CDS             | 8306012   | 8306213   | . | + | . | ID=Xetro.N00125.1.CDS.3;Parent=Xetro.N00125.1;             |
| scaffold_5 | NO | three_prime_UTR | 8306214   | 8306784   | . | + | . | ID=Xetro.N00125.1.three_prime_UTR.1;Parent=Xetro.N00125.1; |
| scaffold_5 | NO | mRNA            | 8302934   | 8306784   | . | + | . | ID=Xetro.N00125.2;Name=rpl35a.2;Parent=Xetro.N00125;       |
| scaffold_5 | NO | exon            | 8302934   | 8304222   | . | + | . | ID=Xetro.N00125.2.exon.1;Parent=Xetro.N00125.2;            |
| scaffold_5 | NO | five_prime_UTR  | 8302934   | 8304211   | . | + | . | ID=Xetro.N00125.2.five_prime_UTR.1;Parent=Xetro.N00125.2;  |
| scaffold_5 | NO | CDS             | 8304212   | 8304222   | . | + | 0 | ID=Xetro.N00125.2.CDS.1;Parent=Xetro.N00125.2;             |
| scaffold_5 | NO | exon            | 8304967   | 8305119   | . | + | . | ID=Xetro.N00125.2.exon.2;Parent=Xetro.N00125.2;            |
| scaffold_5 | NO | CDS             | 8304967   | 8305119   | . | + | 1 | ID=Xetro.N00125.2.CDS.2;Parent=Xetro.N00125.2;             |
| scaffold_5 | NO | exon            | 8306012   | 8306156   | . | + | . | ID=Xetro.N00125.2.exon.3;Parent=Xetro.N00125.2;            |
| scaffold_5 | NO | CDS             | 8306012   | 8306156   | . | + | 1 | ID=Xetro.N00125.2.CDS.3;Parent=Xetro.N00125.2;             |
| scaffold_5 | NO | exon            | 8306716   | 8306784   | . | + | . | ID=Xetro.N00125.2.exon.4;Parent=Xetro.N00125.2;            |
| scaffold_5 | NO | CDS             | 8306716   | 8306739   | . | + | 0 | ID=Xetro.N00125.2.CDS.4;Parent=Xetro.N00125.2;             |
| scaffold_5 | NO | three_prime_UTR | 8306740   | 8306784   | . | + | . | ID=Xetro.N00125.2.three_prime_UTR.1;Parent=Xetro.N00125.2; |
| scaffold_5 | NO | mRNA            | 8302934   | 8306784   | . | + | . | ID=Xetro.N00125.3;Name=rpl35a.3;Parent=Xetro.N00125;       |
| scaffold_5 | NO | exon            | 8302934   | 8303420   | . | + | . | ID=Xetro.N00125.3.exon.1;Parent=Xetro.N00125.3;            |
| scaffold_5 | NO | five_prime_UTR  | 8302934   | 8303420   | . | + | . | ID=Xetro.N00125.3.five_prime_UTR.1;Parent=Xetro.N00125.3;  |
| scaffold_5 | NO | exon            | 8304180   | 8304211   | . | + | . | ID=Xetro.N00125.3.exon.2;Parent=Xetro.N00125.3;            |
| scaffold_5 | NO | five_prime_UTR  | 8304180   | 8304211   | . | + | . | ID=Xetro.N00125.3.five_prime_UTR.2;Parent=Xetro.N00125.3;  |
| scaffold_5 | NO | CDS             | 8304212   | 8304222   | . | + | 0 | ID=Xetro.N00125.3.CDS.1;Parent=Xetro.N00125.3;             |
| scaffold_5 | NO | exon            | 8304967   | 8305119   | . | + | . | ID=Xetro.N00125.3.exon.3;Parent=Xetro.N00125.3;            |
| scaffold_5 | NO | CDS             | 8304967   | 8305119   | . | + | 1 | ID=Xetro.N00125.3.CDS.2;Parent=Xetro.N00125.3;             |
| scaffold_5 | NO | exon            | 8306012   | 8306156   | . | + | . | ID=Xetro.N00125.3.exon.4;Parent=Xetro.N00125.3;            |
| scaffold_5 | NO | CDS             | 8306012   | 8306156   | . | + | 1 | ID=Xetro.N00125.3.CDS.3;Parent=Xetro.N00125.3;             |
| scaffold_5 | NO | exon            | 8306716   | 8306784   | . | + | . | ID=Xetro.N00125.3.exon.5;Parent=Xetro.N00125.3;            |
| scaffold_5 | NO | CDS             | 8306716   | 8306739   | . | + | 0 | ID=Xetro.N00125.3.CDS.4;Parent=Xetro.N00125.3;             |
| scaffold_5 | NO | three_prime_UTR | 8306740   | 8306784   | . | + | . | ID=Xetro.N00125.3.three_prime_UTR.1;Parent=Xetro.N00125.3; |
| scaffold_5 | NO | mRNA            | 8302934   | 8306784   | . | + | . | ID=Xetro.N00125.4;Name=rpl35a.4;Parent=Xetro.N00125;       |
| scaffold_5 | NO | exon            | 8302934   | 8303443   | . | + | . | ID=Xetro.N00125.4.exon.1;Parent=Xetro.N00125.4;            |
| scaffold_5 | NO | five_prime_UTR  | 8302934   | 8303443   | . | + | . | ID=Xetro.N00125.4.five_prime_UTR.1;Parent=Xetro.N00125.4;  |
| scaffold_5 | NO | exon            | 8304180   | 8304222   | . | + | . | ID=Xetro.N00125.4.exon.2;Parent=Xetro.N00125.4;            |
| scaffold_5 | NO | five_prime_UTR  | 8304180   | 8304211   | . | + | . | ID=Xetro.N00125.4.five_prime_UTR.2;Parent=Xetro.N00125.4;  |
| scaffold_5 | NO | CDS             | 8304212   | 8304222   | . | + | 0 | ID=Xetro.N00125.4.CDS.1;Parent=Xetro.N00125.4;             |
| scaffold_5 | NO | exon            | 8304967   | 8305119   | . | + | . | ID=Xetro.N00125.4.exon.3;Parent=Xetro.N00125.4;            |
| scaffold_5 | NO | CDS             | 8304967   | 8305119   | . | + | 1 | ID=Xetro.N00125.4.CDS.2;Parent=Xetro.N00125.4;             |
| scaffold_5 | NO | exon            | 8306012   | 8306156   | . | + | . | ID=Xetro.N00125.4.exon.4;Parent=Xetro.N00125.4;            |
| scaffold_5 | NO | CDS             | 8306012   | 8306156   | . | + | 1 | ID=Xetro.N00125.4.CDS.3;Parent=Xetro.N00125.4;             |
| scaffold_5 | NO | exon            | 8306716   | 8306784   | . | + | . | ID=Xetro.N00125.4.exon.5;Parent=Xetro.N00125.4;            |
| scaffold_5 | NO | CDS             | 8306716   | 8306739   | . | + | 0 | ID=Xetro.N00125.4.CDS.4;Parent=Xetro.N00125.4;             |
| scaffold_5 | NO | three_prime_UTR | 8306740   | 8306784   | . | + | . | ID=Xetro.N00125.4.three_prime_UTR.1;Parent=Xetro.N00125.4; |
| scaffold_5 | NO | mRNA            | 8302934   | 8306784   | . | + | . | ID=Xetro.N00125.5;Name=rpl35a.5;Parent=Xetro.N00125;       |
| scaffold_5 | NO | exon            | 8302934   | 8302954   | . | + | . | ID=Xetro.N00125.5.exon.1;Parent=Xetro.N00125.5;            |
| scaffold_5 | NO | five_prime_UTR  | 8302934   | 8302954   | . | + | . | ID=Xetro.N00125.5.five_prime_UTR.1;Parent=Xetro.N00125.5;  |
| scaffold_5 | NO | exon            | 8303053   | 8303420   | . | + | . | ID=Xetro.N00125.5.exon.2;Parent=Xetro.N00125.5;            |
| scaffold_5 | NO | five_prime_UTR  | 8303053   | 8303420   | . | + | . | ID=Xetro.N00125.5.five_prime_UTR.2;Parent=Xetro.N00125.5;  |
| scaffold_5 | NO | exon            | 8304180   | 8304222   | . | + | . | ID=Xetro.N00125.5.exon.3;Parent=Xetro.N00125.5;            |
| scaffold_5 | NO | five_prime_UTR  | 8304180   | 8304211   | . | + | . | ID=Xetro.N00125.5.five_prime_UTR.3;Parent=Xetro.N00125.5;  |
| scaffold_5 | NO | CDS             | 8304212   | 8304222   | . | + | 0 | ID=Xetro.N00125.5.CDS.1;Parent=Xetro.N00125.5;             |
| scaffold_5 | NO | exon            | 8304967   | 8305119   | . | + | . | ID=Xetro.N00125.5.exon.4;Parent=Xetro.N00125.5;            |
| scaffold_5 | NO | CDS             | 8304967   | 8305119   | . | + | 1 | ID=Xetro.N00125.5.CDS.2;Parent=Xetro.N00125.5;             |
| scaffold_5 | NO | exon            | 8306012   | 8306156   | . | + | . | ID=Xetro.N00125.5.exon.5;Parent=Xetro.N00125.5;            |
| scaffold_5 | NO | CDS             | 8306012   | 8306156   | . | + | 1 | ID=Xetro.N00125.5.CDS.3;Parent=Xetro.N00125.5;             |
| scaffold_5 | NO | exon            | 8306716   | 8306784   | . | + | . | ID=Xetro.N00125.5.exon                                     |

|             |    |                 |         |         |   |   |   |                                                            |
|-------------|----|-----------------|---------|---------|---|---|---|------------------------------------------------------------|
| scaffold_5  | NO | five_prime_UTR  | 8304180 | 8304211 | . | + | . | ID=Xetro.N00125.6.five_prime_UTR.2;Parent=Xetro.N00125.6;  |
| scaffold_5  | NO | CDS             | 8304212 | 8304222 | . | + | 0 | ID=Xetro.N00125.6.CDS.1;Parent=Xetro.N00125.6;             |
| scaffold_5  | NO | exon            | 8304967 | 8305119 | . | + | . | ID=Xetro.N00125.6.exon.3;Parent=Xetro.N00125.6;            |
| scaffold_5  | NO | CDS             | 8304967 | 8305119 | . | + | 1 | ID=Xetro.N00125.6.CDS.2;Parent=Xetro.N00125.6;             |
| scaffold_5  | NO | exon            | 8306012 | 8306156 | . | + | . | ID=Xetro.N00125.6.exon.4;Parent=Xetro.N00125.6;            |
| scaffold_5  | NO | CDS             | 8306012 | 8306156 | . | + | 1 | ID=Xetro.N00125.6.CDS.3;Parent=Xetro.N00125.6;             |
| scaffold_5  | NO | exon            | 8306716 | 8306784 | . | + | . | ID=Xetro.N00125.6.exon.5;Parent=Xetro.N00125.6;            |
| scaffold_5  | NO | CDS             | 8306716 | 8306739 | . | + | 0 | ID=Xetro.N00125.6.CDS.4;Parent=Xetro.N00125.6;             |
| scaffold_5  | NO | three_prime_UTR | 8306740 | 8306784 | . | + | . | ID=Xetro.N00125.6.three_prime_UTR.1;Parent=Xetro.N00125.6; |
| scaffold_29 | NO | gene            | 22976   | 27272   | . | - | . | ID=Xetro.N00388;Name=rpl38;                                |
| scaffold_29 | NO | mRNA            | 22976   | 27272   | . | - | . | ID=Xetro.N00388.1;Name=rpl38.1;Parent=Xetro.N00388;        |
| scaffold_29 | NO | exon            | 27243   | 27272   | . | - | . | ID=Xetro.N00388.1.exon.1;Parent=Xetro.N00388.1;            |
| scaffold_29 | NO | exon            | 27056   | 27085   | . | - | . | ID=Xetro.N00388.1.exon.2;Parent=Xetro.N00388.1;            |
| scaffold_29 | NO | exon            | 25680   | 25740   | . | - | . | ID=Xetro.N00388.1.exon.3;Parent=Xetro.N00388.1;            |
| scaffold_29 | NO | exon            | 24571   | 24693   | . | - | . | ID=Xetro.N00388.1.exon.4;Parent=Xetro.N00388.1;            |
| scaffold_29 | NO | exon            | 22976   | 23041   | . | - | . | ID=Xetro.N00388.1.exon.5;Parent=Xetro.N00388.1;            |
